# Supplementary material for: T Cell Vaccination Inhibits Th1/Th17/Tfh Frequencies and Production of Autoantibodies in Collagen-Induced Arthritis
Source: Hindawi journal article supplement (doi:10.1155/2013/967301), 2013-01-01
Supplement: f1 [file 967301.f1.pdf]

**Supplemental Figure 1. Clinical assessment of CIA after adoptive transfer of CD4, CD4+CD25<sup>-</sup> and CD4+CD25<sup>+</sup> T cells.** The two experimental groups were transferred different T cell subsets from CIA and TCV-treated mice. Mice of each group were adoptive transferred with CD4<sup>+</sup>, CD4+CD25<sup>-</sup> and CD4+CD25<sup>+</sup> T cells, respectively. After 14 days, clinical scores were assessed. Data are represented as means  $\pm$  SD (n=5 mice/group). Data are representative of 3 separate experiments with similar results. \*P<0.05, CD4+CD25<sup>-</sup> vs. CD4+T cells adoptive transfer. #P<0.05, CD4+CD25<sup>+</sup> vs. CD4+T cells adoptive transfer. \$P<0.05, CD4+CD25<sup>-</sup> vs. CD4+CD25<sup>-</sup>T cells adoptive transfer.

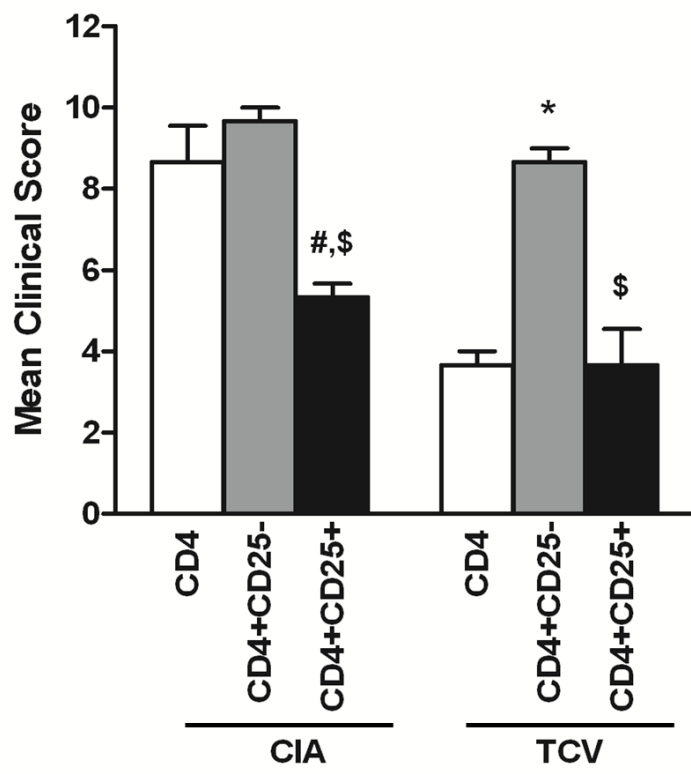

Supplemental Fig 1.
